## Classification and prediction of frontotemporal dementia based on plasma microRNAs

Iddo Magen<sup>1</sup>, Nancy Sara Yacovzada<sup>1</sup>, Jason D. Warren<sup>2</sup>, Carolin Heller<sup>2,3</sup>, Imogen Swift<sup>2,3</sup>, Yoana Bobeva<sup>4</sup>, Andrea Malaspina<sup>4</sup>, Jonathan D. Rohrer<sup>2\*</sup> Pietro Fratta<sup>5\*</sup> and Eran Hornstein<sup>1\*</sup>

1 Department of Molecular Genetics, Weizmann Institute of Science, Rehovot, Israel

2 Dementia Research Centre, and 3 UK Dementia Research Institute, Department of Neurodegenerative Disease, UCL Queen Square Institute of Neurology, London, UK.

4 Centre for Neuroscience and Trauma, Blizard Institute, Barts and the London School of Medicine and Dentistry, Queen Mary University of London, London, UK.

5 Department of Neuromuscular Diseases, UCL Queen Square Institute of Neurology, London, UK

\* To whom correspondence should be addressed: [j.rohrer@ucl.ac.uk](mailto:j.rohrer@ucl.ac.uk); [p.fratta@ucl.ac.uk](mailto:p.fratta@ucl.ac.uk); [eran.hornstein@weizmann.ac.il](mailto:eran.hornstein@weizmann.ac.il);

Abstract word count: 242.

Text word count (excluding references and figure legends): 3528.

No. of items (figures, tables): 4, 2

References: 39

## 2 **Abstract**

3 Frontotemporal dementia (FTD) is a heterogeneous neurodegenerative disorder characterized by  
4 frontal and temporal lobe atrophy, typically manifesting with behavioural or language  
5 impairment. Because of its heterogeneity and lack of available diagnostic laboratory tests there  
6 can be a substantial delay in diagnosis. Cell-free, circulating, microRNAs are increasingly  
7 investigated as biomarkers for neurodegeneration, but their value in FTD is not yet established.  
8 In this study, we investigate microRNAs as biomarkers for FTD diagnosis. We performed next  
9 generation small RNA sequencing on cell-free plasma from 52 FTD cases and 21 controls. The  
10 analysis revealed the diagnostic importance of 20 circulating endogenous miRNAs in  
11 distinguishing FTD cases from controls. The study was repeated in an independent second cohort  
12 of 117 FTD cases and 35 controls. The combinatorial microRNA signature from the first cohort,  
13 precisely diagnosed FTD samples in a second cohort. To further increase the generalizability of  
14 the prediction, we implemented machine learning techniques in a merged dataset of the two  
15 cohorts, which resulted in a comparable or improved classification precision with a smaller panel  
16 of miRNA classifiers. In addition, there are intriguing molecular commonalities with cell free  
17 miRNA signature in ALS, a motor neuron disease that resides on a pathological continuum with  
18 FTD. However, the signature that describes the ALS-FTD spectrum is not shared with blood  
19 miRNA profiles of patients with multiple sclerosis. Thus, microRNAs are  
20 promising FTD biomarkers that might enable earlier detection of FTD and improve accurate  
21 identification of patients for clinical trials

## 23 **Introduction**

24 Frontotemporal dementia (FTD) is a clinically and neuroanatomically heterogeneous  
25 neurodegenerative disorder characterized by frontal and temporal lobe atrophy. It typically  
26 manifests between the ages of 50 and 70 with behavioral or language problems, and below the  
27 age of 65 is the second most common form of dementia, after Alzheimer's disease (1).

28  
29 Due to heterogeneity in clinical presentation FTD can be difficult to diagnose (2). Three main  
30 phenotypes are described: behavioral variant frontotemporal dementia (bvFTD), characterized by  
31 changes in social behaviour and conduct, semantic dementia (SD), characterized by the loss  
32 of semantic knowledge, leading to impaired word comprehension, and progressive non-fluent  
33 aphasia (PNFA), characterized by progressive difficulties in speech production (2, 3).

34  
35 FTD is also pathologically heterogeneous with inclusions seen containing hyperphosphorylated  
36 tau (4), TDP-43 (5), or fused in sarcoma (FUS) (6, 7). Mutations in the genes encoding for these  
37 proteins, as well as in other genes such as progranulin (GRN), chromosome 9 open reading  
38 frame 72 (C9ORF72), valosin-containing protein (VCP), TANK-binding kinase 1 (TBK1) and  
39 charged multivesicular body protein 2B (CHMP2B) are also associated with FTD (8-11).

40  
41 FTD overlaps clinically, pathologically and genetically with several other degenerative disorders.  
42 In particular, there is often overlap with amyotrophic lateral sclerosis (ALS): one in 5 ALS  
43 patients meets the clinical criteria for a concomitant diagnosis of FTD, and one in eight FTD  
44 patients is also diagnosed with ALS. TDP-43 inclusions are observed in the brains of both people

45 with FTD and ALS, and genetic evidence supports that these diseases reside along a continuum  
46 (5, 12-14).

47  
48 Previous studies have aimed to develop cell-free biomarkers for FTD, including TDP-43 (15),  
49 tau (16), and neurofilament light chain (NfL) (17), but none of these have shown use for  
50 diagnosis. microRNAs (miRNAs), endogenous non-coding RNAs, can be quantified in biofluids  
51 (18), and have been shown previously to be dysregulated in amyotrophic lateral sclerosis (ALS)  
52 and in FTD (19). Furthermore, they may be biomarkers of disease progression in other brain  
53 diseases, including ALS (20). Previous studies have assessed the initial potential of microRNAs  
54 as diagnostic FTD biomarkers including miRNA analysis in plasma (21-23), CSF and serum  
55 (24), and CSF exosomes (25) but no definitive markers have so far been found. We therefore  
56 aimed to study a large cohort of patients with different clinical phenotypes and pathological  
57 forms of FTD, to see whether they are able to reliably distinguish cases from controls, and  
58 different forms of FTD from each other.

59  
60 Here, we provide an unbiased signature of plasma miRNAs that has good diagnostic power in a  
61 large and heterogeneous cohort of patients with FTD, which is further predictive in an  
62 independent second cohort and may contribute to FTD subtyping. Therefore, circulating  
63 miRNAs hold a fascinating potential as diagnostic biomarkers and as means for patient  
64 stratification in clinical trials.

65

66

67

## 68 **Results**

### 69 **A plasma miRNA classifier for FTD**

70 In order to characterize the potential of plasma miRNAs as biomarkers for FTD we assembled a  
71 cohort of 73 plasma samples (subject information in Table 1), purified RNA and performed next  
72 generation sequencing (NGS). As many as 2313 individual miRNA species were aligned to the  
73 human genome (GRCh37/hg19) across all samples. However, only 137 miRNA species  
74 exceeded a cut-off of  $\geq 100$  UMIs per sample averaged on all samples. Of the 137 detected  
75 miRNAs, 20 miRNA changed in a statistically significant manner in FTD plasma relative to  
76 control (p-value  $< 0.05$ , Wald test; Fig. 1A). Two miRNAs, whose levels decreased to the  
77 greatest extent in FTD compared to controls, namely, miR-379-5p and miR-654-3p (1.4 fold),  
78 remained significant after multiple hypothesis testing (Fig. 1B).

79  
80 We next studied miRNA capacity as binary disease classifiers, by generating receiver-operating  
81 characteristic (ROC) curves. ROC area under the curve (AUC) suggested modest predictive  
82 capacity for miR-379-5p and for miR-654-3p (AUC for both:  $0.71 \pm 0.07$ ,  $p < 0.01$ ; Fig. 1C).

83  
84 We further utilized the combinatorial signature of the 20 miRNAs that were differentially  
85 expressed between FTD patient plasma and control (Table S1). Using these, an ROC AUC of  
86  $0.79 \pm 0.05$  ( $p < 0.0001$ , Fig. 1C) was found, which was superior to the prediction capacity of any  
87 individual miRNA.

88

89

## 90 **Assessment of plasma miRNA classifier for FTD in a second cohort**

91 We then performed a replication study in an independent cohort of 117 FTD cases and 35 age-  
92 matched controls (Table 1). In this study, the levels of 58 miRNAs decreased and 89 increased in  
93 a statistically significant manner in FTD, relative to control plasma (p-value <0.05, Wald test,  
94 Fig. 2A and Table S1). Noticeable miRNAs were miR-125b-2-3p ( $\times 26$  up,  $p = 1.4 \times 10^{-25}$ ), miR-  
95 34b-5p ( $\times 23$  up, adj.  $p = 9.8 \times 10^{-23}$ ) and miR-379-5p ( $\times 2.2$  down,  $p = 1.9 \times 10^{-14}$ ). 144 of the 147  
96 miRNAs further survived adjustment for multiple comparisons by Benjamini–Hochberg  
97 procedure (adjusted p-value < 0.05).

98

99 The expression of the 20 miRNAs that were most differentially expressed in the first cohort  
100 correlated with their respective expression in the second cohort (Pearson R of log 2 fold-change  
101 = 0.75,  $p=0.0001$ , Fig. 2B). Furthermore, the combined predictive power of the 20 miRNAs, that  
102 were decided on as a classifier based on data of the first cohort, was slightly superior in the  
103 replication cohort, with an AUC of  $0.82 \pm 0.04$  ( $p < 0.0001$ , Fig. 2C).

104

105 In addition to external validation, by testing a second cohort, we sought to guarantee the  
106 generalizability by building a machine learning gradient boosting classifier on a unified cohort.  
107 and applying K-fold cross-validation, which is an internal validation technique to evaluate  
108 performance and prevent overfitting (26, 27). Towards this we divided the 225 datasets (from 56  
109 control and 169 FTD samples) randomly into three equal parts, or ‘folds’, of 75 datasets, each. A  
110 machine learning model was trained using each time 2 of the 3 data folds (150 samples) for  
111 building a prediction model and applying the prediction rule to estimate the prediction precision  
112 on the remaining 75 samples in the remaining third fold. This step was repeated  $k = 3$  times

113 iteratively so all folds were used twice in training and once for the testing process. 136 miRNAs  
114 that were measured above noise levels in all cohorts were included, yielding the following  
115 AUCs: 0.90 for fold 1; 0.87 for fold 2; and 0.93 for fold 3, with an average AUC of 0.90 (Fig.  
116 2D).

117  
118 We next aimed to reduce the complexity of the measurements required for disease prediction by  
119 identifying the top 20 miRNA predictors per fold, i.e. the 20 miRNAs with the highest weighted  
120 importance in predicting disease status (Fig. 3A-C). We reduced the number of miRNAs  
121 gradually, starting from a 43 miRNA panel composed of the top 20 predictors in at least one fold  
122 (i.e., in one, two or three folds), which resulted in AUCs of 0.87, 0.87, 0.94 and an average AUC  
123 of 0.89 (Fig. 3D). We then utilized 13 miRNAs that were among the top 20 in at least two folds  
124 which resulted in AUCs of 0.85, 0.89 and 0.93, and an average of 0.89 (Fig. 3E). Finally, we  
125 used only four miRNAs - miR-26a-5p, miR-326, miR-203a-3p and miR-629-5p – that were  
126 among the top 20 predictors in all three folds. Their combinatorial AUCs after cross-validation  
127 were 0.81, 0.83 and 0.89 and 0.85 on average (Fig. 3F). All panels of miRNAs used for the  
128 cross-validation are listed in Table S1.

129  
130 These measurements were comparable to the AUC obtained with 136 miRNAs (Fig. 2D),  
131 revealing that the diagnostic power was not compromised by a substantial reduction of the  
132 miRNA numbers.

133

134

135

136

### 137 **Overlap between FTD miRNA signature and ALS miRNA signature**

138 FTD and ALS are two diseases on a neuropathology continuum. We aimed to determine whether  
139 the miRNA signatures found in FTD and in ALS reveal any molecular similarity. For this  
140 purpose, we sequenced and analyzed the differences between 115 ALS cases and 103 controls  
141 (see Table 2). We also sequenced 17 samples from patients with multiple sclerosis (MS), because  
142 this disease is mechanistically different from FTD and involves autoimmune-related  
143 demyelination, so molecular similarity to FTD is not expected to be seen. 161 miRNA species  
144 were differentially expressed in either one of the diseases (FTD, ALS or MS) vs controls.  
145 Differentially expressed miRNAs in either FTD or ALS were correlated in fold-change values  
146 between the diseases (Pearson R for log-transformed values = 0.35,  $p < 0.0001$ , Fig. 4A), but no  
147 such correlation was found between FTD and MS ( $R = -0.15$ ,  $p = 0.15$ , Fig. 4B). Intriguingly,  
148 muscle-specific miR-206 robustly increases in ALS, in agreement with previous reports (28-31)  
149 with no change at all in FTD.

150

151 We next tested the degree of overlap between miRNAs differentially expressed in FTD vs. ALS.  
152 Seven out of 20 miRNAs changed exclusively in FTD, and the remaining 13 miRNAs changed  
153 in a significant manner in both FTD and ALS (Fig. 4C; Table S1). Remarkably, the directionality  
154 of change for these miRNAs (increase/decrease) was consistent across diseases for all of the  
155 miRNAs but one, miR-29a-3p which decreased in FTD and increased in ALS (Fig. 4A).  
156 Moreover, the fold-change values in this subset of 13 miRNAs that have changed in both ALS  
157 and FTD, were highly correlated between the diseases (Pearson R = 0.90,  $p < 0.0001$ ). In contrast,  
158 only five out of the 20 miRNAs that changed in FTD, also changed in MS (Fig. 4D; Table S1).



159 Taken together, the miRNA signature in FTD plasma shows a similarity to the ALS plasma  
160 signature, but not to the MS signature, in accordance with pathological and clinical similarities  
161 between FTD and ALS.

162  
163 Finally, we employed the FTD predictor, based on 20 miRNAs that are changing in FTD on ALS  
164 and healthy control cohorts. The signature of 20 miRNAs was able to correctly call ALS from  
165 controls more than at random (ROC AUC = 0.63,  $p < 0.001$ , Table S2), while the seven miRNAs  
166 that are exclusively changed in FTD were not able to distinguish between ALS and control in a  
167 statistically significant manner (ROC AUC = 0.57,  $p = 0.06$ ). Thus, miRNAs that are differentially  
168 expressed in FTD have a moderate capacity to predict ALS.

169  
170 **miRNAs signature of FTD subtypes and FTD patients with different pathologies**

171 We next tested whether specific miRNAs changed in the main FTD subtypes, bvFTD, SD and  
172 PNFA. After statistical adjustment for multiple comparisons, four miRNAs decreased in a  
173 significant manner in PNFA, and two miRNAs decreased and one miRNA increased  
174 significantly in bvFTD, whereas the small SD sample numbers ( $n=8$ ) did not allow to depict  
175 microRNAs that are changed in a significant manner after adjustment for multiple comparisons  
176 (Fig. S1A-C).

177  
178 We calculated a decent combinatorial predictive power for the 20 miRNAs in distinguishing  
179 bvFTD / SD / PNFA from healthy controls: thus, for bvFTD vs. healthy controls in the original  
180 cohort we obtained an AUC of  $0.85 \pm 0.06$ ,  $p < 0.0001$ ; in the replication cohort AUC of

181 0.80±0.05,  $p < 0.0001$ , Fig. S1D; for SD vs. controls, original cohort AUC was 0.86±0.08,  
182  $p = 0.003$ ; replication cohort AUC was 0.79±0.06,  $p = 0.0003$  (Fig. S1E); for PNFA vs. controls,  
183 original cohort AUC was 0.81±0.08,  $p = 0.002$ ; replication cohort AUC was 0.81±0.05,  $p < 0.0001$   
184 (Fig. S1F). We concluded that the combinatorial 20 miRNAs signature distinguishes FTD and its  
185 subtypes from controls with comparable AUCs, for all three subtypes.

186  
187 The overlap of symptoms between subtypes of FTD poses a diagnostic challenge (32). We  
188 therefore tested whether FTD subtypes could be distinguished based on miRNA signature. We  
189 analyzed miRNA differential expression of PNFA cases vs. non-PNFA, which pooled together  
190 bvFTD and SD cases, due to a similar molecular signature of SD and bvFTD. Fourteen miRNAs  
191 changed in a significant manner in PNFA vs non-PNFA: miR-625-3p, miR-625-5p, miR-126-5p,  
192 miR-146a-5p, miR-146b-5p, miR-340-5p, miR-181a-5p (all increased in PNFA compared to  
193 non-PNFA) and miR-342-3p, let-7d-3p, miR-122-5p, miR-192-5p, miR-16-5p, miR-203a-3p  
194 (decreased; Fig. S1G). The combinatorial signature of these fourteen miRNAs yielded an AUC  
195 of 0.81±0.08 (Fig. S1H;  $p = 0.0007$ ), indicating that PNFA can be differentiated from other types  
196 of FTD with a high accuracy.

197  
198 We also tested whether specific miRNAs changed between FTD cases with different likely  
199 underlying pathologies, i.e. tau and TDP-43. 19 FTD cases with predicted Tau pathology based  
200 on genetics (4 in cohort I + 15 in cohort II) were compared to 63 cases with predicted TDP-43  
201 pathology (23 in cohort I + 40 in cohort II). Fourteen miRNAs changed in a statistically  
202 significant manner, but none remained significant after correction for multiple hypotheses (Fig.  
203 S2A). The combinatorial signature of these 14 miRNAs had a weak classification power, though

204 it was statistically significant (AUC of ROC =  $0.7 \pm 0.06$ ,  $p=0.009$ , Fig. S2B). Taken together, the  
205 miRNA profile in our dataset has limited diagnostic power for pathological subtypes of FTD, as  
206 opposed to FTD vs control and different clinical subtypes of FTD.

207

208

## 209 **Discussion**

210 Our study utilizes a large cohort of FTD blood samples. It is the first work that employs next  
211 generation sequencing technology for FTD biomarkers. We defined a signature, composed of 20  
212 miRNAs, that is able to classify FTD. This signature that was discovered in an initial cohort was  
213 informative when applied to a second cohort. These observations suggest that miRNAs can be  
214 potentially utilized in clinical sampling as diagnostic FTD markers, which is needed because of  
215 non-specific early symptoms and overlap with other degenerative and non-degenerative  
216 conditions. Ours is the largest cohort used for miRNA profile, and its use of unbiased exhaustive  
217 next generation sequencing can potentially explain the discrepancies from past studies with  
218 smaller cohorts and biased miRNA choices (21-25).

219 A classifier panel of 20 miRNAs had ~80% chance to correctly call FTD in the first cohort.  
220 Reassuringly, it was comparably informative in calling FTD correctly also on a second cohort. In  
221 addition to external (second cohort) validation, we applied machine learning to the whole dataset  
222 of 225 samples. Through iterative learning, we defined a signature created by 136 miRNAs that  
223 was able to call FTD correctly in 90% of cases. We then reduced the signature complexity to the  
224 usage of only 43 miRNAs with the highest classification power that kept a true FTD calling  
225 capacity of 90%. Toward clinical diagnostic usage it is warranted to test the predictor that was  
226 developed in machine learning on an independent cohort, preferentially of different ethnicity.

227

228 Interestingly, the miRNA signatures of FTD is akin of ALS perhaps reflecting on a shared patho-  
229 mechanism for these two neurodegenerative disorders on the ALS-FTD continuum. This  
230 similarity cannot be extended to multiple sclerosis, a disease that is driven by a different,

231 autoimmune, mechanism. Nonetheless, the two diseases are still two different entities and  
232 accordingly only 10% of the miRNAs that has changed in either disease were shared.

233

234 In summary, we have characterized a large FTD plasma cohort for miRNA expression by next  
235 generation sequencing and found specific patterns of changes that can contribute to diagnosis of  
236 FTD. These patterns seem to involve the ALS-FTD continuum, alluding to differences and  
237 commonalities in the underlying mechanisms that drive molecular changes in ALS and FTD.

238

239

## 240 **Materials and Methods**

### 241 **Standard protocol approvals, registrations, and patient consents**

242 Approvals were obtained from the local research ethics committee and all participants provided  
243 written consent (or gave verbal permission for a carer to sign on their behalf). For ALS samples,  
244 recruitment, sampling procedures and data collection have been performed according to Protocol  
245 (Protocol number 001, version 5.0 Final – 30th November 2015).

### 246 **Study design**

247 Based on power analysis, we found that about 20 control and 50 FTD samples are required to  
248 obtain an ROC of 0.7 with a power of 80% and a p-value of 0.05. We determined the sample size  
249 based on these calculations. Because sample processing was done in different batches, samples  
250 were randomly allocated to the batches and within each batch, the number of control and  
251 FTD/ALS/MS samples was balanced in order to reduce batch-associated bias.

### 252 **Participants and sampling**

253 Participants were enrolled in the longitudinal FTD cohort studies at UCL. Frozen plasma  
254 samples from the UCL FTD Biobank were shipped to the Weizmann Institute of Science for  
255 molecular analysis. Study cohort I: 52 FTD patients, 21 healthy controls. Study cohort II: 117  
256 FTD patients, 35 healthy controls. FTD patients were further assigned into two groups with  
257 predicted pathology of TDP-43 or tau, based on genetics and clinical phenotype. Patients  
258 positive for C9ORF72 repeats and progranulin (PRGN) mutations and/or presented with  
259 semantic dementia, were predicted to have TDP-43 pathology, while patients with MAPT  
260 mutations were predicted to have tau pathology. Demographic data are detailed in table 1.

261 ALS and MS samples and their respective healthy controls (N = 115, 17 and 103, respectively)  
262 were obtained from the ALS biomarker study. ALS patients were diagnosed according to

263 standard criteria by experienced ALS neurologists (33). Healthy controls were typically spouses  
264 or relatives of patients. Demographic data are detailed in table 2.

265 Plasma samples were stored in  $-80^{\circ}\text{C}$  until RNA extraction and subsequent small RNA next  
266 generation sequencing.

267

### 268 **Small RNA next generation sequencing**

269 Total RNA was extracted from plasma using the miRNeasy micro kit (Qiagen, Hilden, Germany)  
270 and quantified with Qubit fluorometer using RNA broad range (BR) assay kit (Thermo Fisher  
271 Scientific, Waltham, MA). For small RNA next generation sequencing (NGS), libraries were  
272 prepared from 7.5 ng of total RNA using the QIAseq miRNA Library Kit and QIAseq miRNA  
273 NGS 48 Index IL (Qiagen), by an experimenter who was blinded to the identity of samples.  
274 Following 3' and 5' adapter ligation, small RNA was reverse transcribed, using unique  
275 molecular identifier (UMI), primers of random 12-nucleotide sequences. This way, precise linear  
276 quantification miRNA is achieved, overcoming potential PCR-induced biases (18). cDNA  
277 libraries were amplified by PCR for 22 cycles, with a 3' primer that includes a 6-nucleotide  
278 unique index. Following size selection and cleaning of libraries with magnetic beads, quality  
279 control was performed by measuring library concentration with Qubit fluorometer using dsDNA  
280 high sensitivity (HS) assay kit (Thermo Fisher Scientific, Waltham, MA) and confirming library  
281 size with TapeStation D1000 (Agilent). Libraries with different indices were multiplexed and  
282 sequenced on a single NextSeq 500/550 v2 flow cell (Illumina), with 75bp single read and 6bp  
283 index read. Fastq files were demultiplexed using the User-friendly Transcriptome Analysis  
284 Pipeline (UTAP) developed at the Weizmann Institute (34). Sequences were mapped to the  
285 human genome using Qiagen GeneGlobe [analysis web tool](#).

286

## 287 **Statistical analysis and machine learning**

288 Plasma samples with  $\geq 40,000$  total miRNA UMIs were included. miRNA with average  
289 abundance of  $\geq 100$  UMIs per sample, across all samples, were considered above noise levels.  
290 miRNA NGS data was analyzed via DESeq2 package in R Project for Statistical Computing (35,  
291 36), under the assumption that miRNA counts followed negative binomial distribution and data  
292 were corrected for library preparation batch in order to reduce its potential bias. Ratio of  
293 normalized FTD counts to the normalized control counts presented after logarithmic  
294 transformation on base 2. *P* values were calculated by Wald test (36, 37) and adjusted for  
295 multiple testing according to Benjamini and Hochberg (38). For binary classification by  
296 miRNAs, receiver operating characteristic (ROC) curves for individual miRNAs or combinations  
297 of miRNAs were plotted based on voom transformation of gene expression data in R (39).  
298 Graphs were generated with GraphPad Prism 5.

299 Machine learning approach was performed to build a Gradient Boosting classifier with 136  
300 miRNAs. Cohorts were merged and case-control number imbalance was mitigated by applying  
301 ADASYN algorithm (<https://imbalanced-learn.readthedocs.io/en/stable/api.html>), which  
302 simulates synthetic new healthy sample data from the existing data. Then, K-Fold cross  
303 validation was performed on the pooled data set with  $K=3$ . An ROC was generated for each of  
304 the three folds and individual and mean AUCs were calculated.

305

306



307 **Acknowledgements**

308 We thank Vittoria Lombardi (UCL) for technical assistance. We acknowledge patients with  
309 FTD, ALS, MS and healthy volunteers for their contribution and ALS biomarkers study co-  
310 workers for biobanking, which has made this study possible (REC 09/H0703/27). We also thank  
311 the the North Thames Local Research Network (LCRN) for its support. EH is the Mondry  
312 Family Professorial Chair and Head of the Nella and Leon Benozziyo Center for Neurological  
313 Diseases.

314

315 **Funding**

316 EH was supported by the ISF Legacy 828/17 grant, Target ALS 118945 grant, European  
317 Research Council under the European Union's Seventh Framework Programme (FP7/2007-2013)  
318 / ERC grant agreement n° 617351. Israel Science Foundation, the ALS-Therapy Alliance, AFM  
319 Telethon 20576 grant, Motor Neuron Disease Association (UK), The Thierry Latran Foundation  
320 for ALS research, ERA-Net for Research Programmes on Rare Diseases (FP7), A. Alfred  
321 Taubman through IsrALS, Yeda-Sela, Yeda-CEO, Israel Ministry of Trade and Industry, Y.  
322 Leon Benozziyo Institute for Molecular Medicine, Benozziyo Center Neurological Disease, Kekst  
323 Family Institute for Medical Genetics, David and Fela Shapell Family Center for Genetic  
324 Disorders Research, Crown Human Genome Center, Nathan, Shirley, Philip and Charlene Vener  
325 New Scientist Fund, Julius and Ray Charlestein Foundation, Fraida Foundation, Wolfson Family  
326 Charitable Trust, Adelis Foundation, MERCK (UK), Maria Halphen, Estates of Fannie Sherr,  
327 Lola Asseof, Lilly Fulop, E. and J. Moravitz. Teva Pharmaceutical Industries Ltd. as part of the  
328 Israeli National Network of Excellence in Neuroscience (NNE) postdoc Fellowship to IM  
329 117941. The Dementia Research Centre is supported by Alzheimer's Research UK, Brain

330 Research Trust, and The Wolfson Foundation. This work was supported by the NIHR Queen  
331 Square Dementia Biomedical Research Unit, the NIHR UCL/H Biomedical Research Centre and  
332 the Leonard Wolfson Experimental Neurology Centre (LWENC) Clinical Research Facility as  
333 well as an Alzheimer's Society grant (AS-PG-16-007). JDR is supported by an MRC Clinician  
334 Scientist Fellowship (MR/M008525/1) and has received funding from the NIHR Rare Disease  
335 Translational Research Collaboration (BRC149/NS/MH). PF is supported by an MRC/MND  
336 LEW Fellowship and by the NIHR UCLH BRC. This work was also supported by the Motor  
337 Neuron Disease Association (MNDA) 839-791

338

339 **Competing interests**

340 The authors state that they have no competing interests.

341

## 342 References

- 343 1. Harvey RJ, Skelton-Robinson M, and Rossor MN. The prevalence and causes of dementia in  
344 people under the age of 65 years. *J Neurol Neurosurg Psychiatry*. 2003;74(9):1206-9.
- 345 2. Rabinovici GD, and Miller BL. Frontotemporal lobar degeneration: epidemiology,  
346 pathophysiology, diagnosis and management. *CNS Drugs*. 2010;24(5):375-98.
- 347 3. Snowden JS, Neary D, and Mann DM. Frontotemporal dementia. *Br J Psychiatry*. 2002;180(140-  
348 3.
- 349 4. Lee G, and Leurgers CJ. Tau and tauopathies. *Prog Mol Biol Transl Sci*. 2012;107(263-93).
- 350 5. Neumann M, Sampathu DM, Kwong LK, Truax AC, Micsenyi MC, Chou TT, Bruce J, Schuck T,  
351 Grossman M, Clark CM, et al. Ubiquitinated TDP-43 in frontotemporal lobar degeneration and  
352 amyotrophic lateral sclerosis. *Science*. 2006;314(5796):130-3.
- 353 6. Neumann M, Rademakers R, Roeber S, Baker M, Kretzschmar HA, and Mackenzie IR. A new  
354 subtype of frontotemporal lobar degeneration with FUS pathology. *Brain*. 2009;132(Pt 11):2922-31.
- 355 7. Neumann M, Roeber S, Kretzschmar HA, Rademakers R, Baker M, and Mackenzie IR. Abundant  
356 FUS-immunoreactive pathology in neuronal intermediate filament inclusion disease. *Acta Neuropathol*.  
357 2009;118(5):605-16.
- 358 8. Fontana F, Siva K, and Denti MA. A network of RNA and protein interactions in Fronto  
359 Temporal Dementia. *Front Mol Neurosci*. 2015;8(9).
- 360 9. Sieben A, Van Langenhove T, Engelborghs S, Martin JJ, Boon P, Cras P, De Deyn PP, Santens P,  
361 Van Broeckhoven C, and Cruts M. The genetics and neuropathology of frontotemporal lobar  
362 degeneration. *Acta Neuropathol*. 2012;124(3):353-72.
- 363 10. van Swieten J, and Spillantini MG. Hereditary frontotemporal dementia caused by Tau gene  
364 mutations. *Brain Pathol*. 2007;17(1):63-73.
- 365 11. Pottier C, Bieniek KF, Finch N, van de Vorst M, Baker M, Perkersen R, Brown P, Ravenscroft T,  
366 van Blitterswijk M, Nicholson AM, et al. Whole-genome sequencing reveals important role for TBK1 and  
367 OPTN mutations in frontotemporal lobar degeneration without motor neuron disease. *Acta Neuropathol*.  
368 2015;130(1):77-92.
- 369 12. Majounie E, Renton AE, Mok K, Dopper EG, Waite A, Rollinson S, Chio A, Restagno G,  
370 Nicolaou N, Simon-Sanchez J, et al. Frequency of the C9orf72 hexanucleotide repeat expansion in  
371 patients with amyotrophic lateral sclerosis and frontotemporal dementia: a cross-sectional study. *Lancet*  
372 *Neurol*. 2012;11(4):323-30.
- 373 13. Renton AE, Majounie E, Waite A, Simon-Sanchez J, Rollinson S, Gibbs JR, Schymick JC,  
374 Laaksovirta H, van Swieten JC, Myllykangas L, et al. A hexanucleotide repeat expansion in C9ORF72 is  
375 the cause of chromosome 9p21-linked ALS-FTD. *Neuron*. 2011;72(2):257-68.
- 376 14. van Es MA, Hardiman O, Chio A, Al-Chalabi A, Pasterkamp RJ, Veldink JH, and van den Berg  
377 LH. Amyotrophic lateral sclerosis. *Lancet*. 2017;390(10107):2084-98.
- 378 15. Feneberg E, Gray E, Ansoorge O, Talbot K, and Turner MR. Towards a TDP-43-Based Biomarker  
379 for ALS and FTL. *Mol Neurobiol*. 2018;55(10):7789-801.
- 380 16. Meeter LHH, Vijverberg EG, Del Campo M, Rozemuller AJM, Donker Kaat L, de Jong FJ, van  
381 der Flier WM, Teunissen CE, van Swieten JC, and Pijnenburg YAL. Clinical value of neurofilament and  
382 phospho-tau/tau ratio in the frontotemporal dementia spectrum. *Neurology*. 2018;90(14):e1231-e9.
- 383 17. Skillback T, Mattsson N, Blennow K, and Zetterberg H. Cerebrospinal fluid neurofilament light  
384 concentration in motor neuron disease and frontotemporal dementia predicts survival. *Amyotroph Lateral*  
385 *Scler Frontotemporal Degener*. 2017;18(5-6):397-403.
- 386 18. Coenen-Stass AML, Magen I, Brooks T, Ben-Dov IZ, Greensmith L, Hornstein E, and Fratta P.  
387 Evaluation of methodologies for microRNA biomarker detection by next generation sequencing. *RNA*  
388 *Biol*. 2018;15(8):1133-45.
- 389 19. Eitan C, and Hornstein E. Vulnerability of microRNA biogenesis in FTD-ALS. *Brain Res*. 2016.
- 390 20. Magen I, Coenen-Stass A, Yacovzada NS, Grosskreutz J, Lu C-H, Greensmith L, Malaspina A,  
391 Fratta P, and Hornstein E. Circulating miR-181a-5p is a prognostic biomarker for amyotrophic lateral  
392 sclerosis. *bioRxiv*. 2019:833079.

- 393 21. Sheinerman KS, Toledo JB, Tzivinsky VG, Irwin D, Grossman M, Weintraub D, Hurtig HI,  
394 Chen-Plotkin A, Wolk DA, McCluskey LF, et al. Circulating brain-enriched microRNAs as novel  
395 biomarkers for detection and differentiation of neurodegenerative diseases. *Alzheimers Res Ther.*  
396 2017;9(1):89.
- 397 22. Grasso M, Piscopo P, Talarico G, Ricci L, Crestini A, Tosto G, Gasparini M, Bruno G, Denti  
398 MA, and Confaloni A. Plasma microRNA profiling distinguishes patients with frontotemporal dementia  
399 from healthy subjects. *Neurobiol Aging.* 2019.
- 400 23. Piscopo P, Grasso M, Puopolo M, D'Acunto E, Talarico G, Crestini A, Gasparini M, Campopiano  
401 R, Gambardella S, Castellano AE, et al. Circulating miR-127-3p as a Potential Biomarker for Differential  
402 Diagnosis in Frontotemporal Dementia. *J Alzheimers Dis.* 2018;65(2):455-64.
- 403 24. Denk J, Oberhauser F, Kornhuber J, Wiltfang J, Fassbender K, Schroeter ML, Volk AE, Diehl-  
404 Schmid J, Prudlo J, Danek A, et al. Specific serum and CSF microRNA profiles distinguish sporadic  
405 behavioural variant of frontotemporal dementia compared with Alzheimer patients and cognitively  
406 healthy controls. *PLoS One.* 2018;13(5):e0197329.
- 407 25. Schneider R, McKeever P, Kim T, Graff C, van Swieten JC, Karydas A, Boxer A, Rosen H,  
408 Miller BL, Laforce R, Jr., et al. Downregulation of exosomal miR-204-5p and miR-632 as a biomarker  
409 for FTD: a GENFI study. *J Neurol Neurosurg Psychiatry.* 2018;89(8):851-8.
- 410 26. Al-Hameed S, Benaissa M, Christensen H, Mirheidari B, Blackburn D, and Reuber M. A new  
411 diagnostic approach for the identification of patients with neurodegenerative cognitive complaints. *PLoS*  
412 *One.* 2019;14(5):e0217388.
- 413 27. Baek S, Tsai CA, and Chen JJ. Development of biomarker classifiers from high-dimensional data.  
414 *Brief Bioinform.* 2009;10(5):537-46.
- 415 28. de Andrade HM, de Albuquerque M, Avansini SH, de SRC, Dogini DB, Nucci A, Carvalho B,  
416 Lopes-Cendes I, and Franca MC, Jr. MicroRNAs-424 and 206 are potential prognostic markers in spinal  
417 onset amyotrophic lateral sclerosis. *J Neurol Sci.* 2016;368(19-24).
- 418 29. Tasca E, Pegoraro V, Merico A, and Angelini C. Circulating microRNAs as biomarkers of  
419 muscle differentiation and atrophy in ALS. *Clin Neuropathol.* 2016;35(1):22-30.
- 420 30. Toivonen JM, Manzano R, Oliván S, Zaragoza P, Garcia-Redondo A, and Osta R. MicroRNA-  
421 206: a potential circulating biomarker candidate for amyotrophic lateral sclerosis. *PLoS One.*  
422 2014;9(2):e89065.
- 423 31. Waller R, Goodall EF, Milo M, Cooper-Knock J, Da Costa M, Hobson E, Kazoka M, Wollff H,  
424 Heath PR, Shaw PJ, et al. Serum miRNAs miR-206, 143-3p and 374b-5p as potential biomarkers for  
425 amyotrophic lateral sclerosis (ALS). *Neurobiol Aging.* 2017;55(123-31).
- 426 32. Hodges JR, and Piguet O. Progress and Challenges in Frontotemporal Dementia Research: A 20-  
427 Year Review. *J Alzheimers Dis.* 2018;62(3):1467-80.
- 428 33. Brooks BR, Miller RG, Swash M, Munsat TL, and World Federation of Neurology Research  
429 Group on Motor Neuron D. El Escorial revisited: revised criteria for the diagnosis of amyotrophic lateral  
430 sclerosis. *Amyotroph Lateral Scler Other Motor Neuron Disord.* 2000;1(5):293-9.
- 431 34. Kohen R, Barlev J, Hornung G, Stelzer G, Feldmesser E, Kogan K, Safran M, and Leshkowitz D.  
432 UTAP: User-friendly Transcriptome Analysis Pipeline. *BMC bioinformatics.* 2019;24(154).
- 433 35. R Core Team. R: A Language and Environment for Statistical Computing. Vienna, Austria. *R*  
434 *Foundation for Statistical Computing* 2015.
- 435 36. Love MI, Huber W, and Anders S. Moderated estimation of fold change and dispersion for RNA-  
436 seq data with DESeq2. *Genome Biol.* 2014;15(12):550.
- 437 37. Anders S, and Huber W. Differential expression analysis for sequence count data. *Genome Biol.*  
438 2010;11(10):R106.
- 439 38. Benjamini Y, Drai D, Elmer G, Kafkafi N, and Golani I. Controlling the false discovery rate in  
440 behavior genetics research. *Behav Brain Res.* 2001;125(1-2):279-84.
- 441 39. Law CW, Chen Y, Shi W, and Smyth GK. voom: Precision weights unlock linear model analysis  
442 tools for RNA-seq read counts. *Genome Biol.* 2014;15(2):R29.

443

444

Magen et al Table 1

|                                                    | Cohort I |             | Cohort II |               |
|----------------------------------------------------|----------|-------------|-----------|---------------|
|                                                    | Control  | FTD         | Control   | FTD           |
| Number of subjects (% males)                       | 21 (62%) | 52 (60%)    | 35 (51%)  | 117 (68%)     |
| Age at enrolment                                   | 52±4 yr. | 65±1 yr.    | 65±1 yr.  | 66±1 yr.      |
| Age of onset (1 <sup>st</sup> reported symptoms)   | N/A      | 61±1 yr.    | N/A       | 60±1 yr.      |
| Disease duration at enrolment                      | N/A      | 4.5±0.3 yr  | N/A       | 6±0.3 yr      |
| Clinical subtype<br>(bvFTD/PNFA/SD/FTD-ALS/others) | N/A      | 25/15/8/2/2 | N/A       | 57/25/20/3/12 |
| Mutation carriers (C9ORF72/MAPT/<br>GRN/TBK1)      | N/A      | 6/4/8/1     | N/A       | 12/10/5/1     |
| Likely pathology (TDP-43/Tau)                      | N/A      | 23/4        | N/A       | 40/15         |

**Table 1.** Summary of demographic and clinical characteristics of FTD Cohorts I and II and control samples. bvFTD: behavioural FTD; PNFA: progressive nonfluent aphasia; SD: semantic dementia

445  
446  
447  
448  
449  
450  
451  
452  
453  
454  
455  
456  
457  
458  
459  
460  
461  
462  
463

Magen et al Table 2

|                              | Controls    | ALS         | MS         |
|------------------------------|-------------|-------------|------------|
| Number of subjects (% males) | 103 (27.2%) | 115 (64.3%) | 17 (29.4%) |
| Age at enrolment             | 52±2 yr.    | 64±1 yr.    | 57±2 yr.   |

465

466 **Table 2.** Summary of demographic and clinical characteristics of ALS, MS and control samples.  
467 ALSFRS-R: ALS functional rating scale. Demographic data recognizes that male ratio and age  
468 of first phlebotomy was significantly different between ALS cohort I and controls (proportion  
469 test:  $p < 0.0001$ ; t-test:  $p < 0.001$ , respectively).  
470

471

472

473

474

475

476

477

478

479

480

481

482

483

484

485

486

487

488

489

Magen et al Figure 1

491

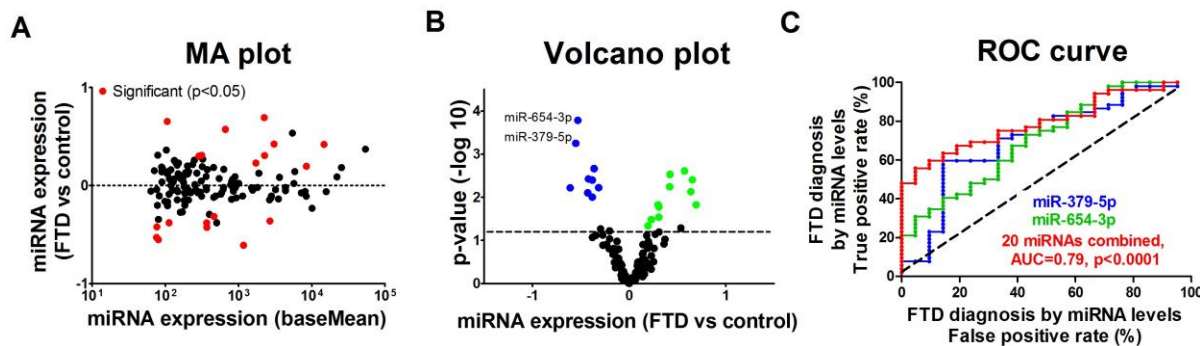

492

493 **Figure 1. Predictive value of differential miRNA expression in FTD plasma.** (A) MA plot of  
494 differential miRNA expression in FTD (n=52) and heathy control (n=21 plasma samples). Log-2  
495 transformed fold-change, against the mean miRNA abundance. Red -significantly changed  
496 miRNAs (p-value  $\leq 0.05$ ). (B) A volcano plot of differentially expressed miRNAs between FTD  
497 (n=52) and heathy control (n=21 plasma samples). Each dot represents a single miRNA, plotted  
498 according to log 2 fold-change (FC) in FTD vs control (X-axis), and the negative log 10  
499 transformation of p-value (Y-axis). Black horizontal line demarcates  $p < 0.05$  and dots denote  
500 miRNAs with statistically significant differential expression in FTD plasma; green - increased in  
501 FTD; blue - decreased in FTD. (C) Receiver operating characteristic (ROC) curves demonstrate  
502 the capacity of miR-379-5p (blue, AUC=0.71,  $p=0.005$ ), miR-654-3p (green, AUC=0.71,  
503  $p=0.006$ ) and of a combinatorial signature of 20 miRNAs, whose differential expression is  
504 significant (red, AUC=0.79,  $p < 0.0001$ ; miRNAs listed in Table S1), to distinguish between FTD  
505 and healthy controls. True positive rate (sensitivity) as a function of the false positive rate (1-  
506 specificity) for different cut-off values. P-values are calculated given null hypothesis of area  
507 under the curve (AUC) =0.5.

508

509

510

511

512

513

514

515



Magen et al Figure 2

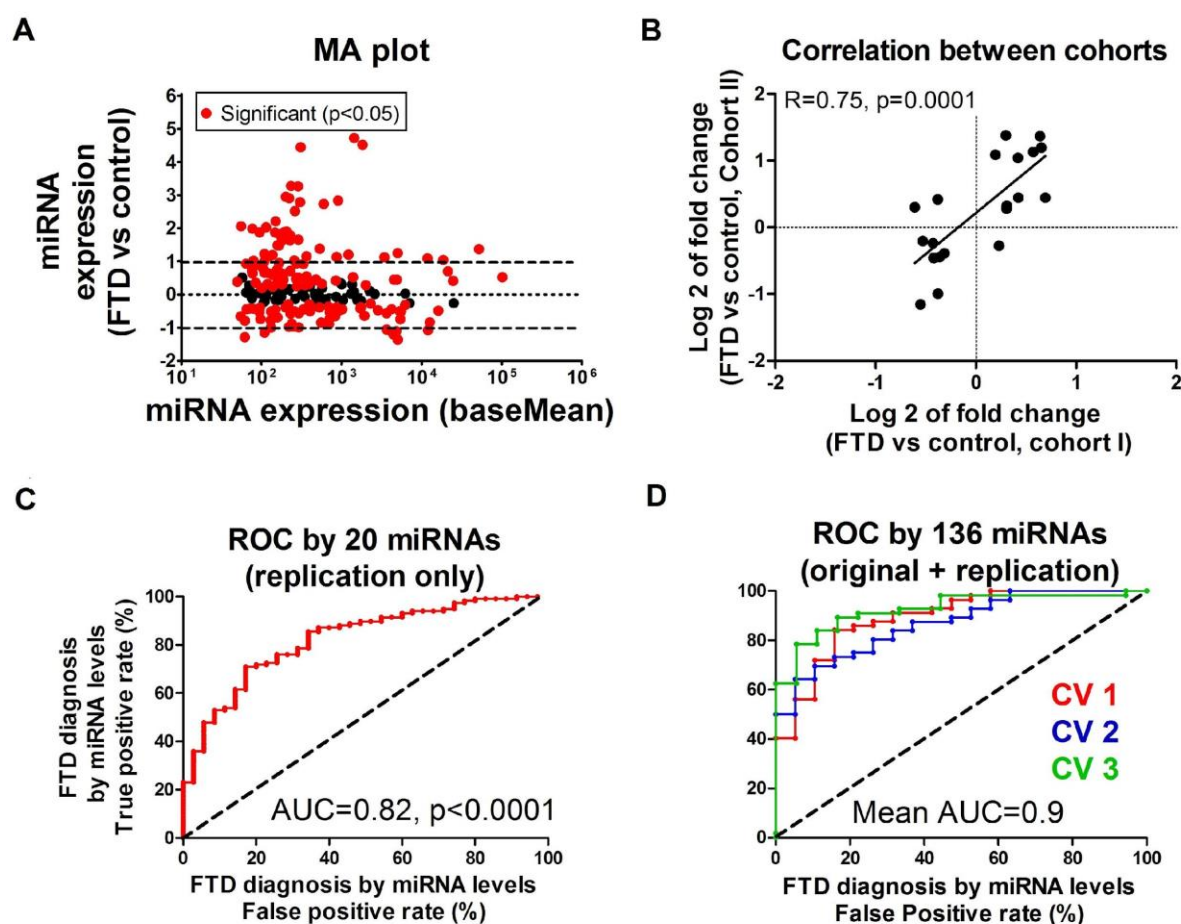

518 **Figure 2. Replication of miRNA signature in a second cohort.** (A) MA plot of differential  
519 miRNA expression in a second cohort of FTD ( $n=117$ ) and a second healthy control cohort ( $n=35$   
520 plasma samples). Log<sub>2</sub> transformed fold-change, against the mean miRNA abundance. Red -  
521 significantly changed miRNAs ( $p$ -value  $\leq 0.05$ ). (B). Scatter plot of correlation between fold  
522 change of 20 miRNAs, which classify FTD, between the first and second cohorts. (C) ROC  
523 curve of a combinatorial signature of 20 miRNAs, whose differential expression is significant in  
524 the first cohort, distinguishes between FTD and healthy controls of the second cohort. True  
525 positive rate (sensitivity) as a function of the false positive rate (1-specificity) for different cut-  
526 off values. P-values are calculated given null hypothesis of area under the curve ( $AUC$ ) = 0.5. (D)  
527 ROC curves of Gradient Boosting Classifier based on K-fold cross validation with  $K=3$  for a  
528 merged data set of 136 miRNA expression in both the discovery and the replication cohort (169  
529 FTD cases and 56 healthy controls). Red, ROC for fold 1; blue, ROC for fold 2; green, ROC for  
530 fold 3.

531

532

533

534

Magen et al Figure 3

536

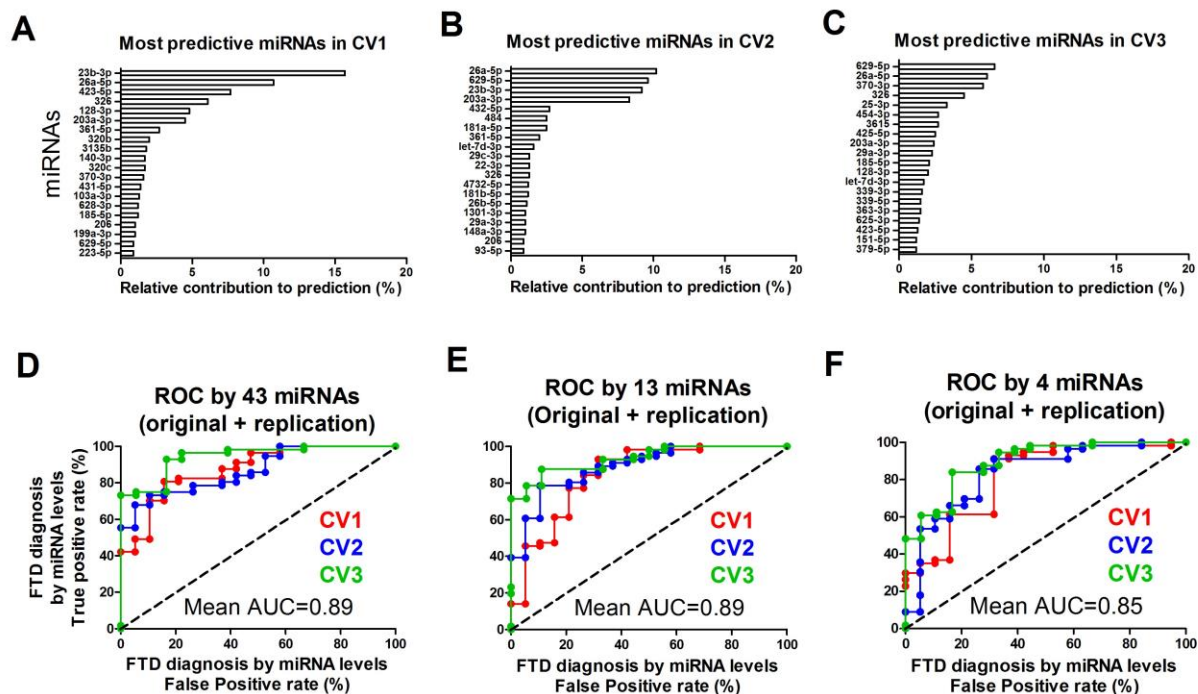

537

538

539 **Figure 3. Most important miRNA predictors in gradient boosting classifier.** Top 20 miRNA  
540 classifiers in (A) cross-validation fold 1 (B) fold 2 and (C) fold 3. (D-F) ROC curves based on  
541 K-fold cross validation with K=3 for a merged data set including both the discovery and the  
542 replication cohort (169 FTD cases and 56 healthy controls), when (D) ROC curves of Gradient  
543 Boosting Classifier with only 43 miRNAs depicted as "top 20" in at least one fold (all of the  
544 miRNAs shown in panels A-C) are selected for classification. (E) 13 miRNAs depicted as "top  
545 20" in at least two folds are selected and (F) only the four miRNAs depicted as "top 20" in all  
546 three folds are selected. Red, ROC for fold 1; blue, ROC for fold 2; green, ROC for fold 3.

547

548

549

550

551

552

553

554

555

Magen et al Figure 4

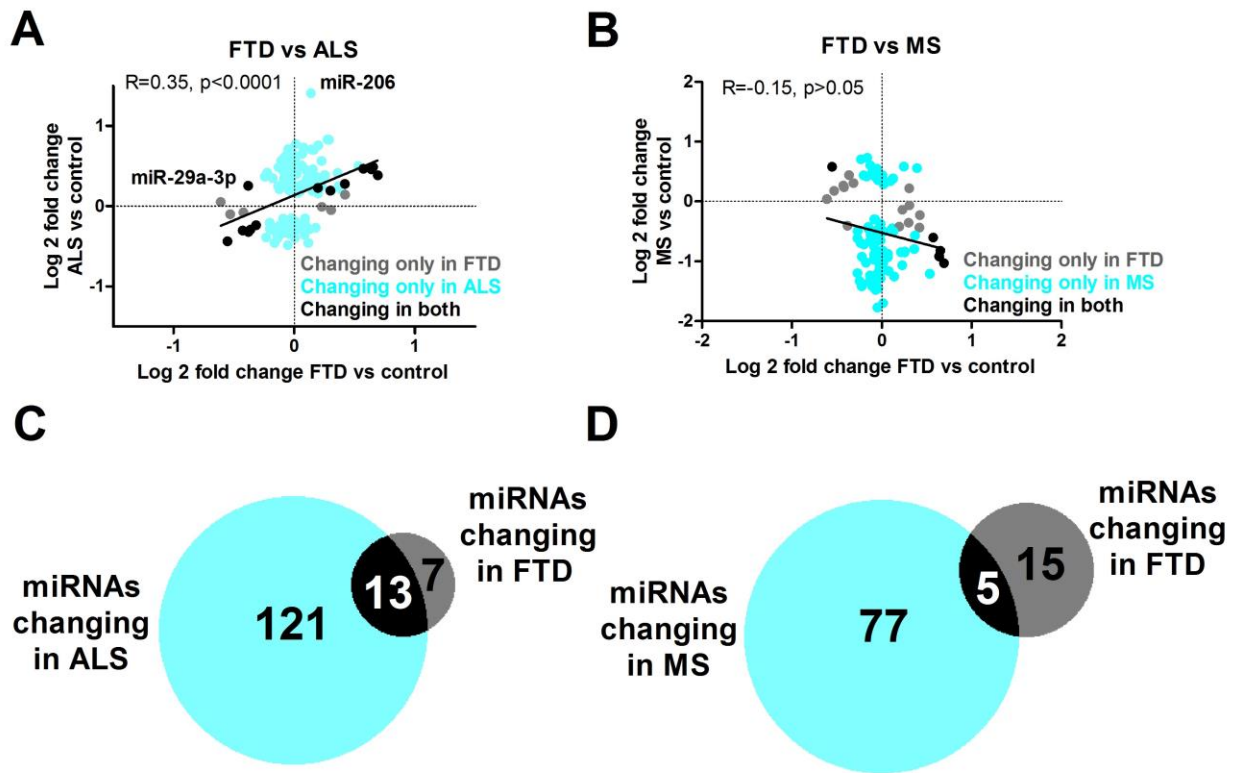

557 **Figure 4. Differential miRNA expression in ALS vs. FTD plasma.** (A) Scatter plot of  
558 correlation between ALS/control ratio and FTD/control ratio. (B) Scatter plot of correlation  
559 between MS/control ratio and FTD/control ratio. (C) Venn diagram of comparison between ALS  
560 and FTD with 13 shared miRNAs in the black portion. (D) Venn diagram of comparison between  
561 MS and FTD with 5 shared miRNAs in the black portion.

562

563 Supplementary figures

564

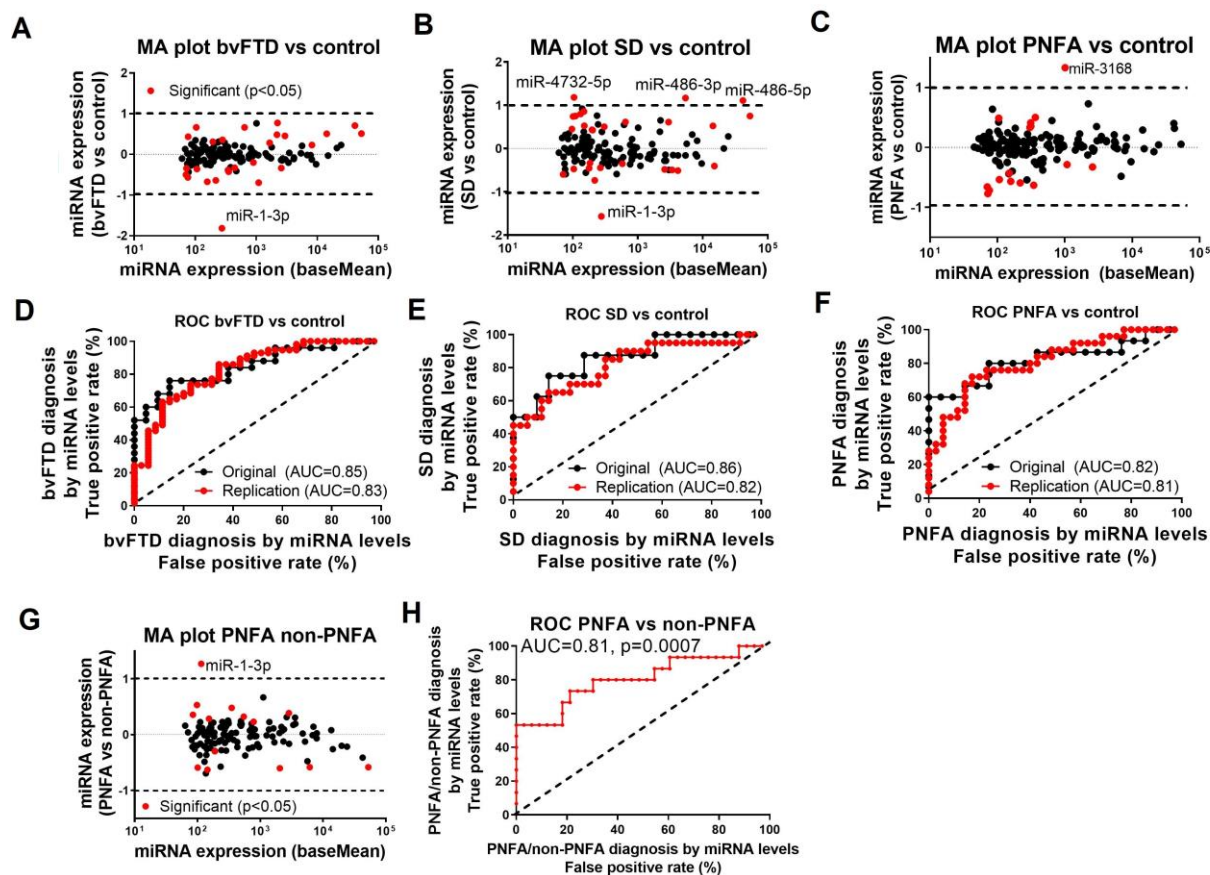

565 **Figure S1. miRNA profiles of FTD subtypes.** (A) MA plots of differential miRNA expression  
 566 in bvFTD patients (n=25), (B) SD patient (n=8) and (C) PNFA patients (n=15) compared to  
 567 healthy controls (n=21). Log-2 transformed fold-change, against mean miRNA abundance. Red -  
 568 significantly changed miRNAs (p-value  $\leq 0.05$ ). ROC curve of a combinatorial signature of 20  
 569 miRNAs, whose differential expression is significant in the first cohort, distinguishes (D)  
 570 bvFTD (E) SD and (F) PNFA from healthy controls, in the first (black) and second (red) studies. True  
 571 positive rate (sensitivity) as a function of the false positive rate (1-specificity) for different cut-  
 572 off values. P-values are calculated given null hypothesis of area under the curve (AUC) =0.5.  
 573 (G) MA plot for differential miRNA expression between PNFA (n=15) and non-PNFA FTD  
 574 cases (bvFTD + SD (n=33)). Red- significantly changed miRNAs (p<0.05). (H) ROC curve  
 575 based on combinatorial signature of 14 significant miRNAs for distinguishing PNFA and non-  
 576 PNFA FTD cases.

577

578

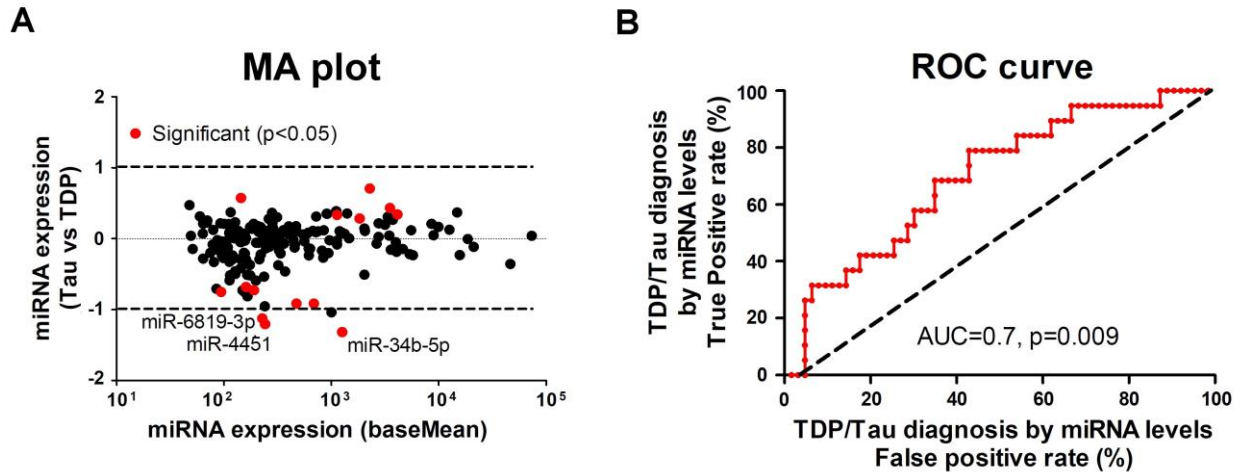

579 **Figure S2. miRNA profiles associated with FTD neuropathologies.** (A) MA plots of  
580 differential miRNA expression in FTD patients with predicted Tau pathology (n=19) vs patients  
581 with predicted TDP-43 pathology (n=63) from both cohorts used in the study. Log-2 transformed  
582 fold-change, against mean miRNA abundance. Red -significantly changed miRNAs (p-value  
583  $\leq 0.05$ ). (B) ROC curve based on combinatorial signature of 14 significant miRNAs for  
584 distinguishing FTD cases with Tau pathology from those with TDP-43 pathology.

585
